# Supplementary material
Source: MDPI journal article supplement (https://www.mdpi.com/2073-445X/6/4/80)
Supplement: s1 [file s1]

## Questionnaire for Local Households

### Section One: General Information

1. Description of Respondent:

- a. Gender: 1. Female 2. Male
- b. Marital Status: 1. Unmarried 2. Married
- c. Ethnicity: 1. Ewe 2. Mo 3. Banda 4. Dagarte 5. Burkinabe 6. Other .....
- d. Household Size: .....

e. Education Level:

|                                          |  |
|------------------------------------------|--|
| 1. Cannot Read/Write                     |  |
| 2. Can Read                              |  |
| 3. Read and Write                        |  |
| 4. Primary                               |  |
| 5. Junior Secondary/Middle School        |  |
| 6. Senior Secondary/Vocational/Technical |  |
| 7. Tertiary                              |  |

f. Primary Occupation (Current): g. Primary Occupation (Before Resettlement):

|                      |  |
|----------------------|--|
| 1. Civil Service     |  |
| 2. Trade/Business    |  |
| 3. Crop Farming      |  |
| 4. Livestock Farming |  |
| 5. Fishing           |  |
| 6. Retired           |  |
| 7. Unemployed        |  |
| 8. Other .....       |  |

|                      |  |
|----------------------|--|
| 1. Civil Service     |  |
| 2. Trade/Business    |  |
| 3. Crop Farming      |  |
| 4. Livestock Farming |  |
| 5. Fishing           |  |
| 6. Retired           |  |
| 7. Unemployed        |  |
| 8. Other .....       |  |

h. Reason for Change in Occupation:

.....

2. Sources of Income

a. Current

|                      |  |
|----------------------|--|
| 1. Service           |  |
| 2. Trade/Business    |  |
| 3. Crop Farming      |  |
| 4. Livestock Farming |  |
| 5. Fishing           |  |
| 6. Remittances       |  |
| 7. Salary            |  |
| 8. Other .....       |  |

b. Prior to Resettlement

|                      |  |
|----------------------|--|
| 1. Service           |  |
| 2. Trade/Business    |  |
| 3. Crop Farming      |  |
| 4. Livestock Farming |  |
| 5. Fishing           |  |
| 6. Remittances       |  |
| 7. Salary            |  |
| 8. Other .....       |  |

3. What type of media do you have?

|                           |  |
|---------------------------|--|
| 1. Television             |  |
| 2. Radio                  |  |
| 3. Cell Phone             |  |
| 4. Newspaper              |  |
| 5. Computer with Internet |  |
| 6. Other .....            |  |

4. What is your primary source of news?

|                           |  |
|---------------------------|--|
| 1. Television             |  |
| 2. Radio                  |  |
| 3. Cell Phone             |  |
| 4. Newspaper              |  |
| 5. Computer with Internet |  |
| 6. Notice Boards          |  |
| 7. Public Forum           |  |
| 8. Other.....             |  |

5. Were you the owner or the tenant of the land that was taken?

1. Owner                      2. Tenant                      3. Shared Ownership: .....

## **Section Two: Transparency – Access to Information**

6. How did you get to know about the Bui Dam Project for the first time?

|                          |               |                          |                          |
|--------------------------|---------------|--------------------------|--------------------------|
| <input type="checkbox"/> | 1. Television | <input type="checkbox"/> | 4. Internet              |
| <input type="checkbox"/> | 2. Radio      | <input type="checkbox"/> | 5. Notice Board          |
| <input type="checkbox"/> | 3. Newspapers | <input type="checkbox"/> | 6. Public Places         |
|                          |               | <input type="checkbox"/> | 7. Public Hearing/Announ |

8. Other.....

7. When did you hear about the project for the first time?

|                          |                                  |                          |                                   |
|--------------------------|----------------------------------|--------------------------|-----------------------------------|
| <input type="checkbox"/> | 1. Less than a year before start | <input type="checkbox"/> | 4. 3 – 5 years before start       |
| <input type="checkbox"/> | 2. One year before start         | <input type="checkbox"/> | 5. More than 5 years before start |
| <input type="checkbox"/> | 3. Two years before start        |                          |                                   |

8. How did you first hear about the Compulsory Land Acquisition and Resettlement in the project?

- |                          |               |                          |                                |
|--------------------------|---------------|--------------------------|--------------------------------|
| <input type="checkbox"/> | 1. Television | <input type="checkbox"/> | 5. Internet                    |
| <input type="checkbox"/> | 2. Radio      | <input type="checkbox"/> | 6. Notice Board                |
| <input type="checkbox"/> | 3. Newspapers | <input type="checkbox"/> | 7. Public Hearing/Announcement |
| <input type="checkbox"/> | 4. Friends    | <input type="checkbox"/> | 8. Household Survey            |
| 9. Other.....            |               |                          |                                |

9. Do you know of the place to get information on the resettlement project?

- ☐ 1. Yes      ☐ 2. No

10. Is it easy to get information from this information office?

- ☐ 1. Yes      ☐ 2. No      ☐ 3. I have never been there before

11. How clear was the information through these media?

|                             | 1.Very Much | 2.Moderate | 3.Some | 4.Not at all | 5.N/A |
|-----------------------------|-------------|------------|--------|--------------|-------|
| Television                  |             |            |        |              |       |
| Radio                       |             |            |        |              |       |
| Cell Phone                  |             |            |        |              |       |
| Newspaper                   |             |            |        |              |       |
| Computer with Internet      |             |            |        |              |       |
| Notice Boards               |             |            |        |              |       |
| Household Survey            |             |            |        |              |       |
| Public Hearing/Announcement |             |            |        |              |       |
| Other.....                  |             |            |        |              |       |

Very Much - Very much to contribute to the process, Moderate - Just enough to know what is going on, Some - A few parts of it.

### **Section Three: Transparency – Openness of the Process**

12. Were you told about the laws governing Compulsory Land Acquisition and Resettlement?

- ☐ 1. Yes      ☐ 2. No

13. Was the explanation of the laws easily understood?

- |                          |                                           |
|--------------------------|-------------------------------------------|
| <input type="checkbox"/> | 1. Very much to contribute to the process |
| <input type="checkbox"/> | 2. Just enough to know what is going on   |
| <input type="checkbox"/> | 3. A few parts of it                      |
| <input type="checkbox"/> | 4. Not at all                             |

14. How long was it between the time you were given notice to move and when you had to move?

- |                          |                         |
|--------------------------|-------------------------|
| <input type="checkbox"/> | 1. Less than 6 months   |
| <input type="checkbox"/> | 2. 6 months to One Year |
| <input type="checkbox"/> | 3. One to two years     |
| <input type="checkbox"/> | 4. More than two years  |

15. Was the process of Compulsory Land Acquisition and Resettlement explained to you?

- |                          |        |                          |       |
|--------------------------|--------|--------------------------|-------|
| <input type="checkbox"/> | 1. Yes | <input type="checkbox"/> | 2. No |
|--------------------------|--------|--------------------------|-------|

16. Was this explanation easily understood?

- |                          |                                           |
|--------------------------|-------------------------------------------|
| <input type="checkbox"/> | 1. Very much to contribute to the process |
| <input type="checkbox"/> | 2. Just enough to know what is going on   |
| <input type="checkbox"/> | 3. A few parts of it                      |
| <input type="checkbox"/> | 4. Not at all                             |

17. How much did you know about the following?

|                          | 1.Very Much | 2.Moderate | 3.Some | 4.Not at all |
|--------------------------|-------------|------------|--------|--------------|
| Compensation Assessment  |             |            |        |              |
| Payment Schedule         |             |            |        |              |
| Resettlement Plans       |             |            |        |              |
| Timetable of the Process |             |            |        |              |

Very Much - Very much to contribute to the process, Moderate - Just enough to know what is going on, Some - A few parts of it.

#### **Section Four: Public Participation – Involvement of Actors**

18. How were you involved in the process?

- |                          |                                           |
|--------------------------|-------------------------------------------|
| <input type="checkbox"/> | a. Very much to contribute to the process |
| <input type="checkbox"/> | b. Just enough to know what is going on   |
| <input type="checkbox"/> | c. A few parts of it                      |
| <input type="checkbox"/> | d. Not at all                             |

19. How were your representatives chosen?

- |                          |                                       |
|--------------------------|---------------------------------------|
| <input type="checkbox"/> | a. Election                           |
| <input type="checkbox"/> | b. Appointment by Acquiring Authority |
| <input type="checkbox"/> | c. Leaders already in place           |
| <input type="checkbox"/> | d. Other.....                         |

20. How often did you meet with your representatives?

- |                          |                              |
|--------------------------|------------------------------|
| <input type="checkbox"/> | 1. Weekly                    |
| <input type="checkbox"/> | 2. Monthly                   |
| <input type="checkbox"/> | 3. When there is information |
| <input type="checkbox"/> | 4. Other.....                |

#### **Section Five: Public Participation – Decision-making Process**

21. Do you know of the place to lodge complaints regarding the resettlement project?

- |                          |        |                          |       |
|--------------------------|--------|--------------------------|-------|
| <input type="checkbox"/> | 1. Yes | <input type="checkbox"/> | 2. No |
|--------------------------|--------|--------------------------|-------|

22. Have you ever lodged a complaint?

- |                          |        |                          |       |
|--------------------------|--------|--------------------------|-------|
| <input type="checkbox"/> | 1. Yes | <input type="checkbox"/> | 2. No |
|--------------------------|--------|--------------------------|-------|

23. Were there follow-ups by the office?

- |                          |                                     |
|--------------------------|-------------------------------------|
| <input type="checkbox"/> | 1. Yes, the matter was resolved     |
| <input type="checkbox"/> | 2. Yes, but there was no resolution |
| <input type="checkbox"/> | 3. No                               |
| <input type="checkbox"/> | 4. Other.....                       |

24. Was the community ever against any plans from the acquiring authority?

- |                          |                                                     |
|--------------------------|-----------------------------------------------------|
| <input type="checkbox"/> | 1. Yes, the plan was dropped                        |
| <input type="checkbox"/> | 2. Yes, the authority negotiated a middle ground    |
| <input type="checkbox"/> | 3. Yes, but the authority went ahead with the plans |
| <input type="checkbox"/> | 4. No                                               |
| <input type="checkbox"/> | 5. Other.....                                       |

25. Was the community consulted with regards to the choice of resettlement site, design, and arrangement of houses?

☐ 1. Yes      ☐ 2. No      3. Other.....

26. Were your views implemented?

☐ 1. Yes      ☐ 2. No      3. Other.....

**Section Six: Equity, Justice, and Rule of Law**

27. Did you have title/papers for the acquired lands?

☐ 1. Yes      ☐ 2. No

28. Do you know anyone who did not have title/papers for the acquired lands?

☐ 1. Yes      ☐ 2. No

29. Was the person compensated?

☐ 1. Yes      ☐ 2. No  
☐ 3.      ☐ 4.

30. Did the community engage any professionals such as lawyers and surveyors to assist in the process?

☐ 1. Yes      ☐ 2. No

31. Who paid for their services?

☐ 1. The Authority      ☐ 2. The Community      ☐ 3. Free

32. Do you have title/papers for your current land?

☐ 1. Yes      ☐ 2. No

33. If you want to sell your land, will you be allowed to?

☐ 1. Yes      ☐ 2. No      ☐ 3. Don't know

34. How long after the compulsory land acquisition and resettlement did you receive your cash compensation?

☐ 1. Less than three months  
☐ 2. Between three and six months  
☐ 3. More than six months

35. How many rooms did you have in your previous house?

.....

36. How many rooms do you have in your current house?  
.....

37. What was the size of your land in the old settlement?  
.....

38. What is the size of the land allocated to you?  
.....

## **Interview Guide for Bui Power Authority and Volta River Authority**

### **Section One: Process, Actors, and their Roles**

1. Who were the key stakeholders during the project implementation?
2. Who were the representatives involved from the communities? Were there any committees?
3. When did the Compulsory Land Acquisition and Resettlement process begin?
4. How was this process undertaken?
5. What were the roles of these stakeholders in the process?
6. What laws in Ghana were applied in the resettlement phase?

### **Section Two: Transparency**

7. Was there an information desk at the old settlements? Who maintained it? (An outsider or a resident).
8. At what point in the process was the information desk established?
9. Is there an information desk/office in the resettlement site?
10. How was information on the process given to the affected persons? What media was used?
11. Were the laws regarding Compulsory Land Acquisition and Resettlement explained to the community members?
12. When were the people in the Resettlement Township B informed that their lands will be affected?
13. How frequent were complaints about the livelihood from the affected persons?

### **Section Three: Public Participation**

14. What are the provisions in handling the complaints of the project affected persons?
15. How were people's views on resettlement taken?
16. What are the factors considered in the choice of the resettlement site?
17. How did the people's views change this?
18. How was the compensation values assessed?
19. Were there negotiations involved?
20. How was the allocation of houses in the resettlement site done?
21. Were there any influences from NGO's and civil society groups?
22. How often did you meet with the people's representatives?

### **Section Four: Equity, Justice, and Rule of Law**

23. How long did it take for the compensation to be paid?
24. (If more than three months) What was the reason for the delay?
25. How did the Authority handle the project affected persons without titles/documents to their lands?



26. How were conflicts regarding the process resolved?
27. Were the project affected persons involved in the discussion of the choice of using the Bui Gorge as the dam?
28. Were alternative locations for the dam evaluated?
29. How was the decision to compulsorily acquire the lands taken? Were the project affected persons involved in the taking of that decision?
30. Can the project affected persons contest the compensation assessed?
31. How did the Authority handle the existence of cultural and religious sites?
32. How did you ensure that the resettlement conformed to the prior lifestyle of the farmers?
33. How were the sizes of the houses and the lands dealt with?

#### **Section Four: Accountability**

34. Were the media and civil society groups involved in checking how the Authority handled the procedure? Was this effective?
35. Were there other government bodies there to keep you in check?
36. How did the Authority justify its decisions with the project affected persons?
37. Was the Authority involved in making sure the people's representatives gave a feedback to the affected persons? How?

## **Forum Guide for Chief's Elders/Unit Committee/Youth Leadership Committee**

### **Section One: Process, Actors, and their Roles**

1. Who were the other actors in the process from your end?
2. Were there any NGO's and civil society groups involved?
3. When did the compulsory land acquisition and resettlement process begin?
4. How was the process undertaken from your perspective?
5. What roles did you play in the process?

### **Section Two: Transparency**

6. Was there an information desk/office in the old settlement? Who maintained this? (Resident or outsider). How did you feel about this?
7. How was information given to you? What media was used?
8. How much access do you have to information concerning your lands?
9. Did you have access to the plans regarding how the process will be done before hand?
10. Were you able to understand the information provided about the process?
11. When seeking information, how long does it take to get what you need?
12. When were you told about the start of the project?
13. Were the laws relating to compulsory land acquisition and resettlement explained to you?

### **Section Three: Public Participation**

14. As representatives, of the people what were your duties in the process?
15. How often did you meet with the general population to brief them on the developments?
16. How often did you meet with the authority?
17. Did you ever have any complaints about the process?
18. Were you able resolve it? How?
19. Have you ever rejected plans regarding the resettlement project?
20. How this impasse resolved?
21. Prior to the compulsory land acquisition, did the authority try to acquire the lands through any other means?
22. Were community members involved in the allocation of houses during the resettlement?

### **Section Four: Equity, Justice, and Rule of Law**

23. Did everyone who was resettled get a title to his land?
24. How was the choice compensation made?
25. Did you hire professionals such as surveyors, lawyers and planners to assist in your decision-making?
26. Who paid for these professionals?
27. How were the compensation values assessed?
28. Did a negotiation take place after the assessment?
29. How long did it take for the compensation to be paid?
30. Were the persons who had no titles to their lands also compensated? How?
31. Do you know of any plans by the Authority to help the resettled persons to get back on their feet?
32. How different were settlers treated from indigenes?
33. Was there a difference in the size of the lands given and the land you were given? What did the authority say about this?

34. Have you been able to contest any portions of the procedure or the compensation assessed?
35. At the time the decision was made to take the land, were you heard on the matter?
36. How were sacred grooves, trees and the like dealt with during the resettlement?
37. Were your local customs and laws taken into consideration?

#### **Section Five: Accountability**

38. How did you divide the responsibilities among yourselves?
39. Were the media and civil society groups involved in the checking of how the authority was handling the procedure? How effective was this?
40. Do you know whether other government bodies were there to keep the authority in check?
41. How did the authority justify its decisions to you?

## **Interview Guide for the Lands Commission**

### **Section One: Process, Actors, and their Roles**

1. When did the Compulsory Land Acquisition process begin?
2. How was this process undertaken?
3. What laws in Ghana were applied in the Compulsory Land Acquisition process phase?

### **Section Two: Transparency**

4. How was information on the process given to the affected persons? What media was used?
5. Were the laws regarding the Compulsory Land Acquisition process explained to the community members?
6. When were the people in the Resettlement Township B informed that their lands will be affected?

### **Section Three: Public Participation**

7. How was the compensation values assessed?
8. Were there negotiations involved?
9. Were there any influences from NGO's and civil society groups?
10. How often did you meet with the people's representatives?

### **Section Four: Equity, Justice, and Rule of Law**

11. How long did it take for the compensation to be paid?
12. (If more than three months) What was the reason for the delay?
13. How did the commission handle those project affected persons without titles/documents to their lands?
14. How were conflicts regarding the process resolved?
15. How was the decision to compulsorily acquire the lands taken? Were the project affected persons involved in the taking of that decision?
16. Can the project affected persons contest the compensation assessed?
17. How were the sizes of the houses and the lands dealt with?

### **Section Four: Accountability**

18. Were the media and civil society groups involved in checking how the Authority handled the procedure? Was this effective?
19. Were there other government bodies there to keep you in check?
20. How did the commission justify its decisions with the project affected persons?
21. Was the commission involved in making sure the people's representatives gave a feedback to the affected persons? How?

## **Interview Guide for the District Assemblyman**

### **Section One: Process, Actors, and their Roles**

1. Who were the other actors in the process from your end?
2. Were there any NGO's and civil society groups involved?
3. When did the compulsory land acquisition and resettlement process begin?
4. How was the process undertaken from your perspective?
5. What roles did you play in the process?

### **Section Two: Transparency**

6. Was there an information desk/office in the old settlement? Who maintained this? (Resident or outsider). How did you feel about this?
7. How was information given to you? What media was used?
8. How much access do you have to information concerning your lands?
9. Did you have access to the plans regarding how the process will be done before hand?
10. Were you able to understand the information provided about the process?
11. When seeking information, how long does it take to get what you need?
12. When were you told about the start of the project?
13. Were the laws relating to compulsory land acquisition and resettlement explained to you?

### **Section Three: Public Participation**

14. As representatives, of the people what were your duties in the process?
15. How often did you meet with the authority?
16. Did you ever have any complaints about the process?
17. Were you able resolve it? How?
18. How was the District Assembly involved in the process?
19. Prior to the compulsory land acquisition, did the authority try to acquire the lands through any other means?
20. Were community members involved in the allocation of houses during the resettlement?

### **Section Four: Equity, Justice, and Rule of Law**

21. Did everyone who was resettled get a title to his land?
22. How was the choice compensation made?
23. Did you hire professionals such as surveyors, lawyers and planners to assist in your decision-making?
24. Who paid for these professionals?
25. How were the compensation values assessed?
26. Did a negotiation take place after the assessment?
27. How long did it take for the compensation to be paid?
28. Were the persons who had no titles to their lands also compensated? How?
29. Do you know of any plans by the Authority to help the resettled persons to get back on their feet?
30. How did the Assembly respond to the complaints related to the things needed by the community that should have been handled by the BPA?
31. How different were settlers treated from indigenes?
32. Was there a difference in the size of the lands given and the land you were given? What did the authority say about this?

33. Have you been able to contest any portions of the procedure or the compensation assessed?
34. At the time the decision was made to take the land, were you heard on the matter?
35. How were sacred grooves, trees and the like dealt with during the resettlement?
36. Were your local customs and laws taken into consideration?

**Section Five: Accountability**

37. How did you divide the responsibilities among yourselves?
38. Were the media and civil society groups involved in the checking of how the authority was handling the procedure? How effective was this?
39. Do you know whether other government bodies were there to keep the authority in check?
40. How did the authority justify its decisions to you?

## Executive Instrument Ordering the Compulsory Land Acquisition

### EXECUTIVE INSTRUMENT

E.I. 70

#### **SATE LANDS-(SITE FOR BUI HYDROELECTRIC POWER PROJECT) INSTRUMENT, 2008**

WHEREAS it appears to the President that the land specified in the Schedule to this Instrument is land required in the public interest.

NOW THEREFORE, in exercise of the powers conferred on the President by subsection (1) of section 1 of the State Lands Act, 1962 (Act 125), this Instrument is made this 6th day of August, 2007.

The land specified in the Schedule to this Instrument is hereby declared to be land required in the public interest.

#### **SCHEDULE**

ALL THAT piece of land (un-numbered) containing an approximate Area of 455,912 Acres situate at Bole and Nsawkaw in the Bole-Bamboi and Tain Districts of the Northern and Brong Ahafo Regions of the Republic of Ghana running in a South-Easterly direction and thus embracing portion of the Black Volta from Ntereso in the North to Bamboi in the South and measuring on the North-West a total distance of 22,581 feet more or less; on the North- East a total distance of 105,423 feet more or less; on the South-East a total distance of 33,305 feet more or less and on the South-West a total distance of 103,627 feet more or less which piece of land is more particularly delineated on Plan No. LC.132/85048 attached hereto and thereon shewn edged Pink.

By Command of the President.

Ms. ESTHER OBENG DAPPAH (MP)  
*Minister of Lands, Forestry and Mines*

*Date of Gazette notification:*

[illegible]
